# Supplementary material for: Fluorescein isothiocyanate embedded silica spheres in gadolinium carbonate shells as novel magnetic resonance imaging and fluorescence bi-modal contrast agents
Source: Royal Society of Chemistry journal article supplement (doi:10.1039/c5nj00537j), 2015-01-01
Supplement: c5nj00537j1.pdf [file c5nj00537j1.pdf]

# Fluorescein isothiocyanate embedded silica spheres in gadolinium carbonate shells as a novel magnetic resonance imaging and fluorescence bi-modal contrast agent

Wen-Yong Hu <sup>a‡</sup>, Huan Liu <sup>a‡</sup>, Yuan-Zhi Shao <sup>\*a</sup>

<sup>a</sup> School of Physics and Engineering, Sun Yat-sen University, Guangzhou 510275, China. Email: [stssyz@mail.sysu.edu.cn](mailto:stssyz@mail.sysu.edu.cn)

<sup>‡</sup> These authors contributed equally to this work.

This file is the supplementary information for the article DOI: 10.1039/b000000x

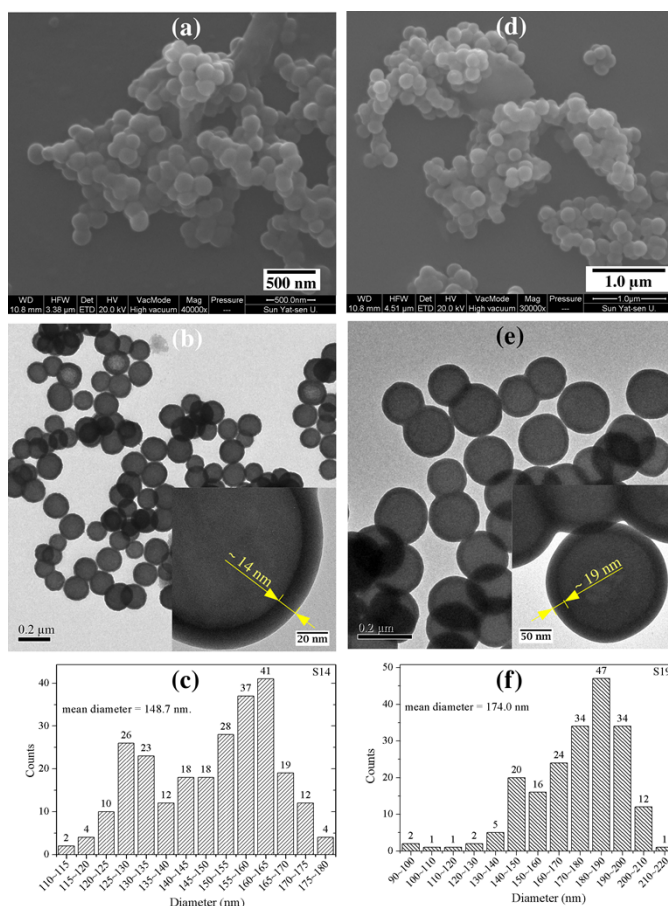

Figure S11. Morphology characterization. Scanned electronic microscopy image (a) and transmission electronic microscopy one (b) of S14, of which the size distribution is (c); SEM image (d) and TEM one (e) of S19, its size distribution is (f).

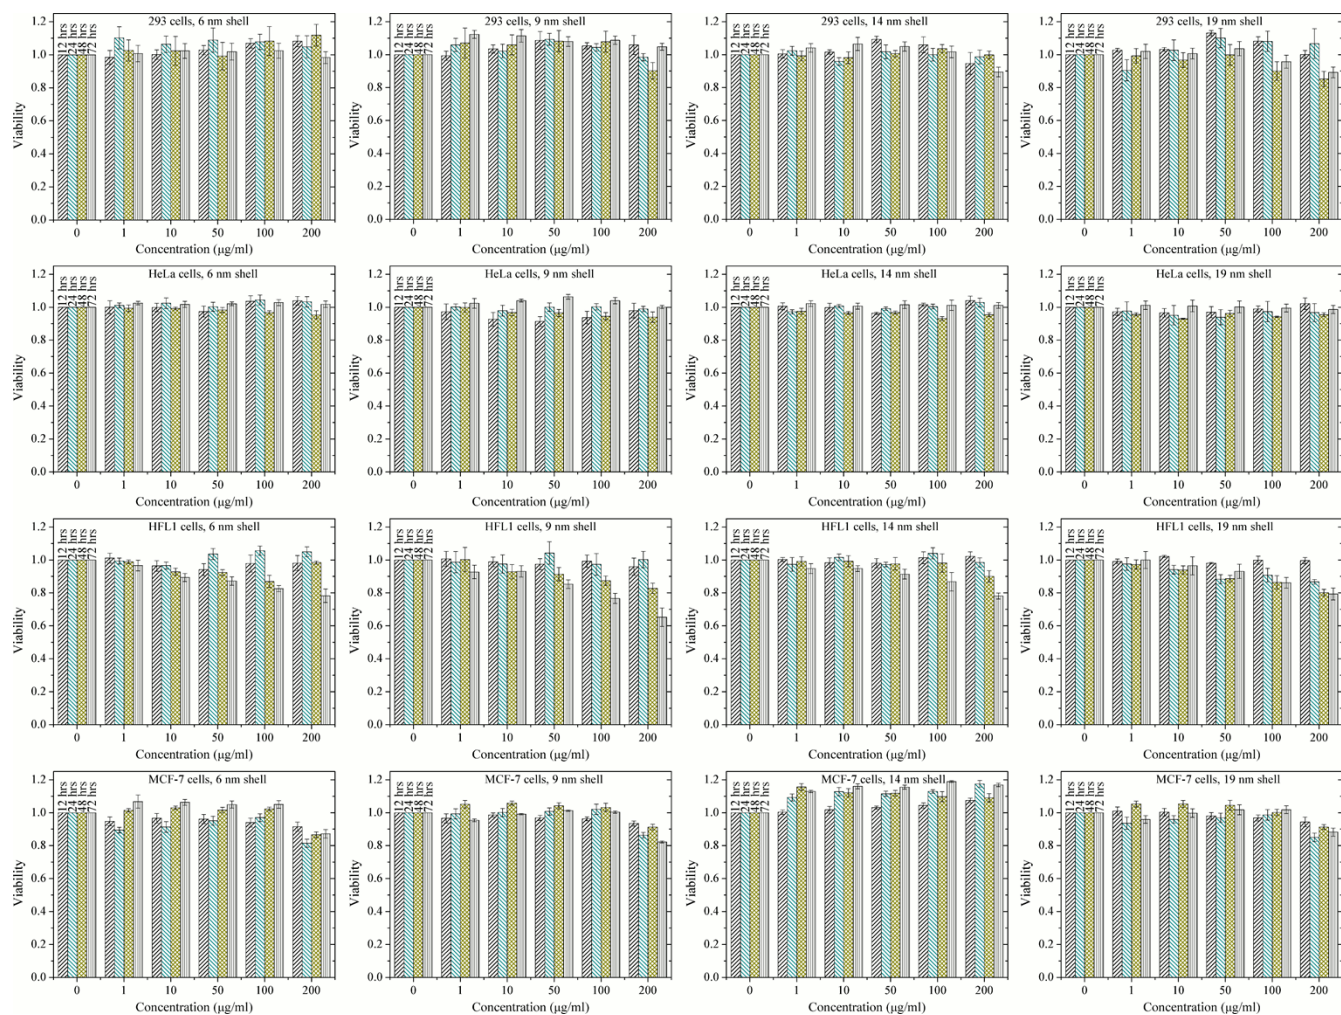

Figure SI2. Full CCK-8 colorimetric assays results.

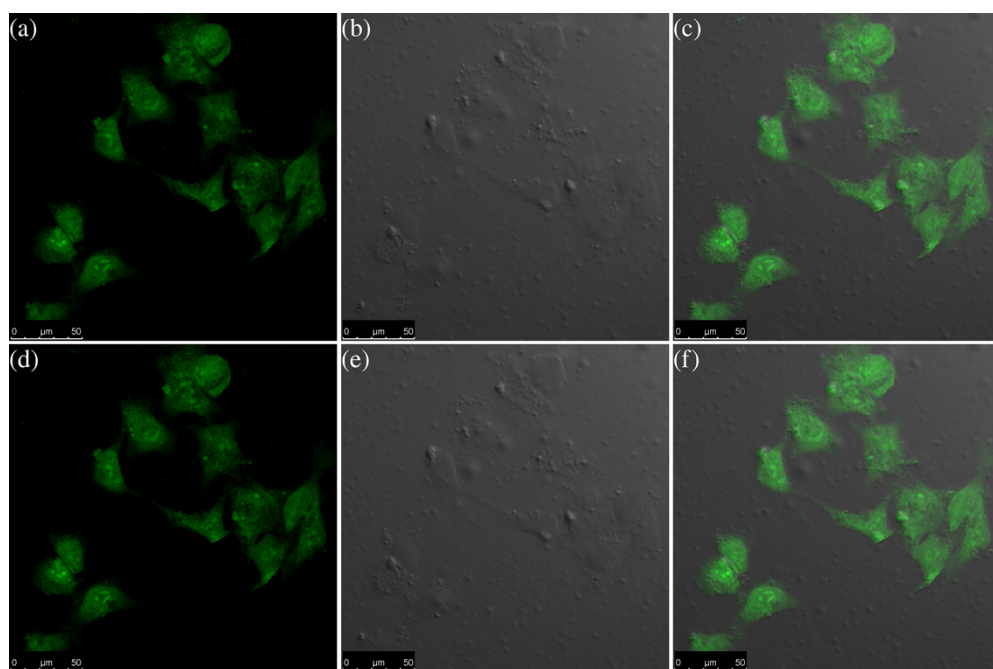

Figure SI3. Laser confocal microscopy images of HeLa cells, which had cultured for 1 hour in the mixture contained 20  $\mu\text{g/ml}$  of the NPs. The cells treated by (a-c) S9 and (d-f) S14 were exposed under (a, d) the light at 488 nm of wavelength, (b, e) white light, (c, f) Merged images from fluorescence and white light imaging.
